# Supplementary material
Source: PubMed Central journal article supplement (PMC3084062)
Supplement: 1102808108_pnas.1102808108_SI.pdf [file 1102808108_pnas.1102808108_SI.pdf]

# Supporting Information

Liu et al. 10.1073/pnas.1102808108

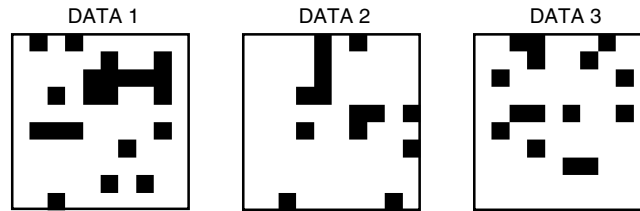

Fig. S1. Spatial distribution of empty Tepui tops (black) at the end of three experiment runs for the three LNCaP datasets shown in Fig. S5. No clear spatial correlations are observed.

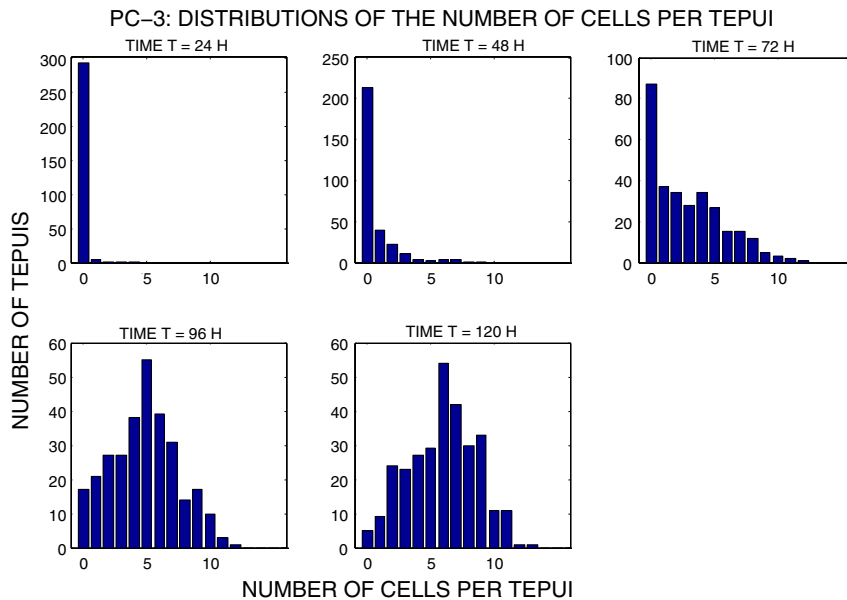

Fig. S2. Distributions of the number of PC-3 cells on each Tepui top at different time steps. A total of 300 Tepuis (from three 10 by 10 arrays) are included in the histograms. A pronounced peak around  $N = 6$  is established at the steady state.





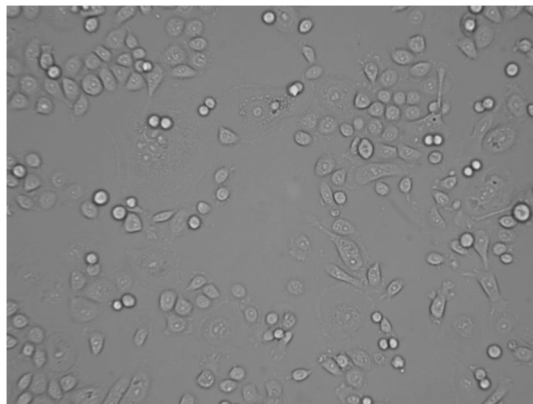

**Movie S2.** PC-3 cell proliferation on gelatin coated plane surface for a total of 48 h. Individual cells were tracked in the video, and the cell diffusion coefficient was estimated.

[Movie S2 \(AVI\)](#)
